# Supplementary material for: Solution plasma synthesis of perovskite hydroxide CoSn(OH)6 nanocube electrocatalysts toward the oxygen evolution reaction
Source: Royal Society of Chemistry journal article supplement (doi:10.1039/d3se00221g), 2023-01-01
Supplement: d3se00221g1.pdf [file d3se00221g1.pdf]

## **Solution plasma synthesis of perovskite hydroxide $\text{CoSn}(\text{OH})_6$ nanocube electrocatalysts toward oxygen evolution reaction**

Masaki Narahara<sup>1</sup>, So Yoon Lee<sup>2</sup>, Kodai Sasaki<sup>1</sup>, Kaito Fukushima<sup>1</sup>, Kenichi Tanaka<sup>1</sup>,

Sangwoo Chae<sup>3</sup>, Xiulan Hu<sup>4</sup>, Gasidit Panomsuwan<sup>5</sup>, Takahiro Ishizaki<sup>2,\*</sup>

<sup>1</sup>Materials Science and Engineering, Graduate School of Engineering and Science, Shibaura Institute of Technology, Tokyo 135-8548, Japan

<sup>2</sup>Department of Materials Science and Engineering, College of Engineering, Shibaura Institute of Technology, Tokyo 135-8548, Japan

<sup>3</sup>SIT Research Laboratories, Shibaura Institute of Technology, Tokyo 135-8548, Japan

<sup>4</sup>College of Materials Science and Engineering, Nanjing Tech University, Nanjing 211816, China

<sup>5</sup>Department of Materials Engineering, Faculty of Engineering, Kasetsart University, Bangkok 10900, Thailand

\*Corresponding author: [ishizaki@shibaura-it.ac.jp](mailto:ishizaki@shibaura-it.ac.jp)

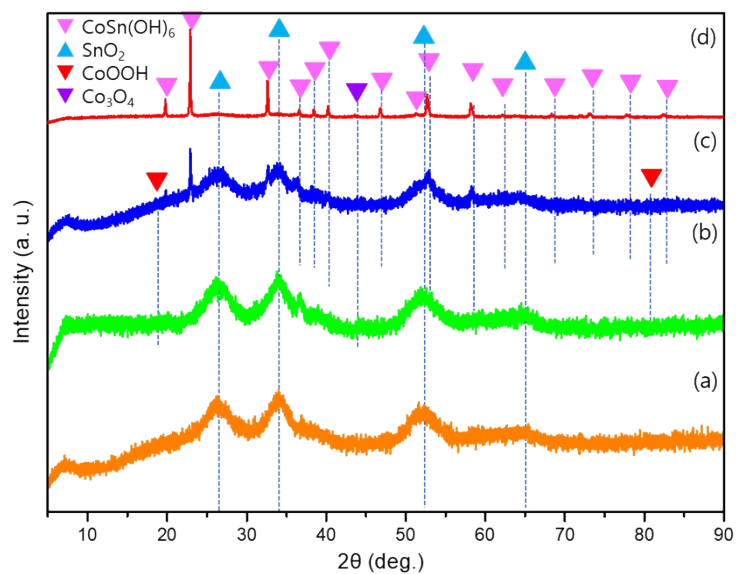

Figure S1. XRD patterns of samples synthesized by co-precipitation method from aqueous solutions at different pH: (a) CSO\_pH8p, (b) CSO\_pH 9p, (c) CSO\_pH10p, and (d) CSO\_pH12p.

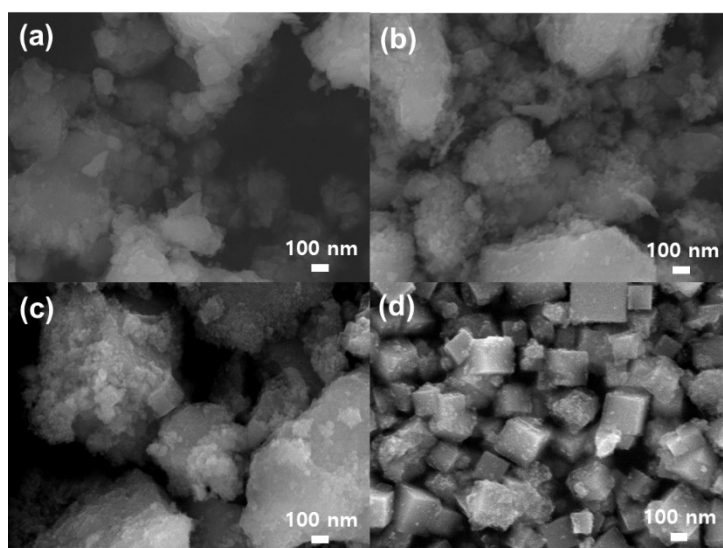

Figure S2. FE-SEM images of samples synthesized by co-precipitation method from aqueous solutions at different pH: (a) CSO\_pH8p, (b) CSO\_pH 9p, (c) CSO\_pH10p, and (d) CSO\_pH12p.

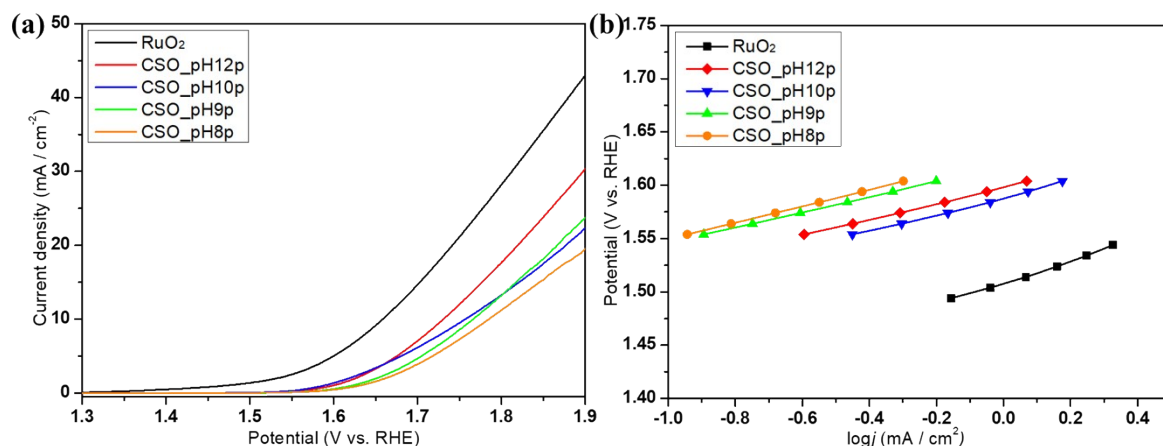

Figure S3. (a) Linear sweep voltammograms of the samples synthesized by co-precipitation method at different pH and commercial RuO<sub>2</sub>, and (b) Tafel slopes of the samples synthesized by co-precipitation method at different pH and commercial RuO<sub>2</sub>.

Table S1 OER onset potentials, potentials at reaching 10 mA/cm<sup>2</sup>, overpotentials at 10 mA/cm<sup>2</sup>, and Tafel slope values of the samples synthesized by co-precipitation method at different pH, and commercial RuO<sub>2</sub>.

| Sample           | OER Onset Potentials [V vs RHE] | Potentials at reaching 10 mA/cm <sup>2</sup> [V vs RHE] | Tafel Slopes [mV/dec.] |
|------------------|---------------------------------|---------------------------------------------------------|------------------------|
| CSO_pH12p        | 1.550                           | 1.731                                                   | 75.08                  |
| CSO_pH10p        | 1.545                           | 1.757                                                   | 78.23                  |
| CSO_pH9p         | 1.565                           | 1.767                                                   | 79.40                  |
| CSO_pH8p         | 1.570                           | 1.785                                                   | 82.35                  |
| RuO <sub>2</sub> | 1.475                           | 1.659                                                   | 73.34                  |

### Calculation method of electrochemically active surface areas (ECSA)

The ECSA of a material with similar composition is proportional to its electrochemical double-layer capacitance ( $C_{dl}$ ), which was measured by CV in a non-Faradaic region at different scan rates ( $V_b$ ) of 20, 50, 100, 200, 400, 600, 800, and 1000 mV s<sup>-1</sup> (Figure 9c and d). Then, the double-layer capacitance ( $C_{dl}$ ) was estimated by plotting the  $\Delta j = (j_a - j_c)$  at 1.273 V vs RHE as a function of the scan rate (Figure 9f). It can be calculated using the equation:

$$C_{dl} = (\Delta j) / 2dV_b$$

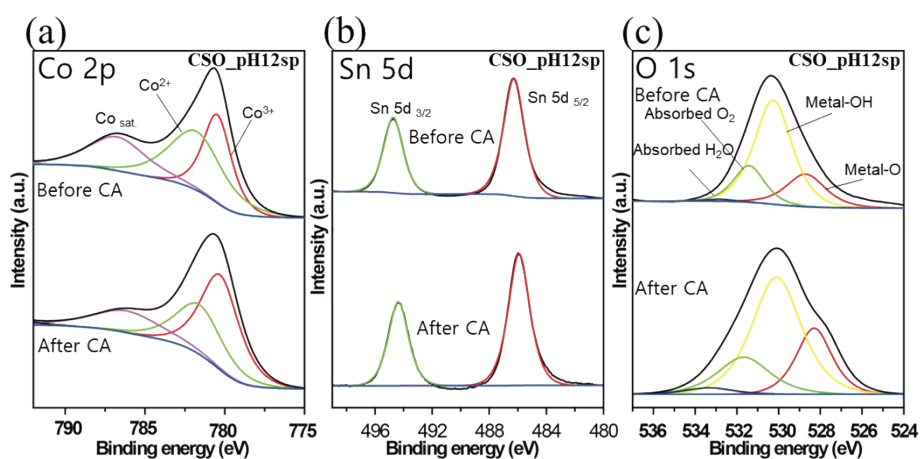

Figure S4. XPS (a) Co 2p, (b) Sn 3d, and (c) O 1s spectra of CSO\_pH12sp before and after CA test.

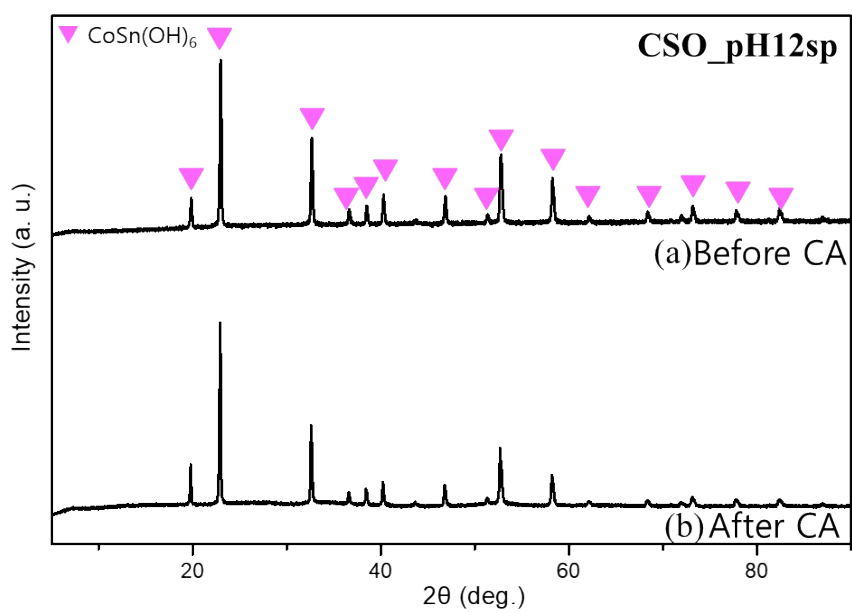

Figure S5. XRD patterns of CSO\_pH12sp (a) before and (b) after the CA test.
